# Supplementary material for: Understanding the origin of the high thermoelectric figure of merit of Zintl-phase KCaBi
Source: Royal Society of Chemistry journal article supplement (doi:10.1039/d4cp01093k), 2024-01-01
Supplement: d4cp01093k1.pdf [file d4cp01093k1.pdf]

## Supporting Information (SI)

# Understanding the origin of high thermoelectric figure of merit of Zintl-phase KCaBi

Sampad Mandal, Atish Ghosh, and Pranab Sarkar\*

*Department of Chemistry, Visva-Bharati, Santiniketan, 731235, India*

E-mail: pranab.sarkar@visva-bharati.ac.in

### S1. Different Charge carrier scattering mechanisms:

The electronic transport properties were calculated by considering the electron-acoustic phonon (acoustic deformation potential), ionized impurity, and electron-optical phonon scattering mechanisms. Under this theoretical approach, the characteristic scattering rate of the charge carriers can be obtained by Matthiessen's rule :  $\frac{1}{\tau} = \frac{1}{\tau_{ADP}} + \frac{1}{\tau_{IMP}} + \frac{1}{\tau_{POP}}$ , where  $\tau_{ADP}$ ,  $\tau_{IMP}$  and  $\tau_{POP}$  are the relaxation time from acoustic deformation potential (ADP), ionized impurity (IMP), and polar-optical phonon scattering, respectively. The mode-dependent scattering rates are calculated using the *momentum relaxation time approximation* (MRTA) (for elastic processes like ADP and IMP scattering) and *self-energy relaxation time approximation* (SERTA) (for inelastic processes like POP scattering) to the Boltzmann transport equation (BTE) within the Born approximation.

For elastic scattering, the expression of relaxation time ( $\tilde{\tau}_{i\mathbf{k}}$ ) for state  $|i\mathbf{k}\rangle$  under the MRT approximation can be written as

$$\tilde{\tau}_{i\mathbf{k}}^{-1} = \int_{-\infty}^{+\infty} \sum_j \frac{d^3q}{\Omega_{BZ}} \left[ 1 - \frac{\mathbf{v}_{i\mathbf{k}} \mathbf{v}_{j\mathbf{k}+\mathbf{q}}}{|\mathbf{v}_{i\mathbf{k}}|^2} \right] \tilde{\tau}_{i\mathbf{k} \rightarrow j\mathbf{k}+\mathbf{q}}^{-1} \quad (1)$$

where  $\Omega_{BZ}$  is the volume of the first Brillouin zone,  $\mathbf{v}_{i\mathbf{k}}$  and  $\mathbf{v}_{j\mathbf{k}+\mathbf{q}}$  are group velocity of the charge carrier in the initial state  $|i\mathbf{k}\rangle$  and final state  $|j\mathbf{k} + \mathbf{q}\rangle$ , respectively.  $\tilde{\tau}_{i\mathbf{k} \rightarrow j\mathbf{k}+\mathbf{q}}^{-1}$  is the partial decay rate for the elastic scattering from initial electronic state  $|i\mathbf{k}\rangle$  to final electronic state  $|j\mathbf{k} + \mathbf{q}\rangle$ .

For inelastic scattering, the expression of relaxation time ( $\tau_{i\mathbf{k}}$ ) for state  $|i\mathbf{k}\rangle$  under the SERT approximation can be written as

$$\tau_{i\mathbf{k}}^{-1} = \int_{-\infty}^{+\infty} \sum_j \frac{d^3q}{\Omega_{BZ}} \tau_{i\mathbf{k} \rightarrow j\mathbf{k}+\mathbf{q}}^{-1} \quad (2)$$

where  $\Omega_{BZ}$  is the volume of the first Brillouin zone,  $\tau_{i\mathbf{k} \rightarrow j\mathbf{k}+\mathbf{q}}^{-1}$  is the partial decay rate for the inelastic scattering from the initial electronic state  $|i\mathbf{k}\rangle$  to the final electronic state  $|j\mathbf{k} + \mathbf{q}\rangle$ .

## S2. Phonon scattering mechanism and corresponding phase space

The lattice thermal conductivities were calculated considering the three-phonon scattering process, which obeys the energy and momentum conservation laws and can be defined as

$$\hbar\omega_{s''q''} = \hbar\omega_{sq} \pm \hbar\omega_{s'q'} \quad (3)$$

$$\hbar q'' = (\hbar q \pm \hbar q') \pm \hbar G$$

where  $q''$ ,  $q'$ , and  $q$  are the wave vectors of the three phonons involved in the three-phonon scattering process and  $s''$ ,  $s'$ , and  $s$  are the modes of the corresponding three phonons.  $G$  is the reciprocal lattice vector, which is zero for normal processes (N-process) and non-

zero for Umklapp-processes (U-process). “+” and “-” correspond to the phonon absorption and emission processes, respectively. The total phase space available for the three-phonon scattering process can be defined as the sum of frequency-weighted sums over all possible modes  $N$  following the Bose-Einstein distribution function  $f$

$$P_3 = P_3^+ + P_3^- \quad (4)$$

where

$$P_3^\pm = \frac{1}{2N} \sum_{s's''} \left\{ \begin{array}{l} 2(f_{s'} - f_{s''}) \\ f_{s'} + f_{s''} + 1 \end{array} \right\} \frac{\delta(\omega_{sq} \pm \omega_{s'q'} - \omega_{s''q''})}{\omega_{sq}\omega_{s'q'}\omega_{s''q''}} \quad (5)$$

### S3. Shifting of Fermi level at different charge carrier concentrations

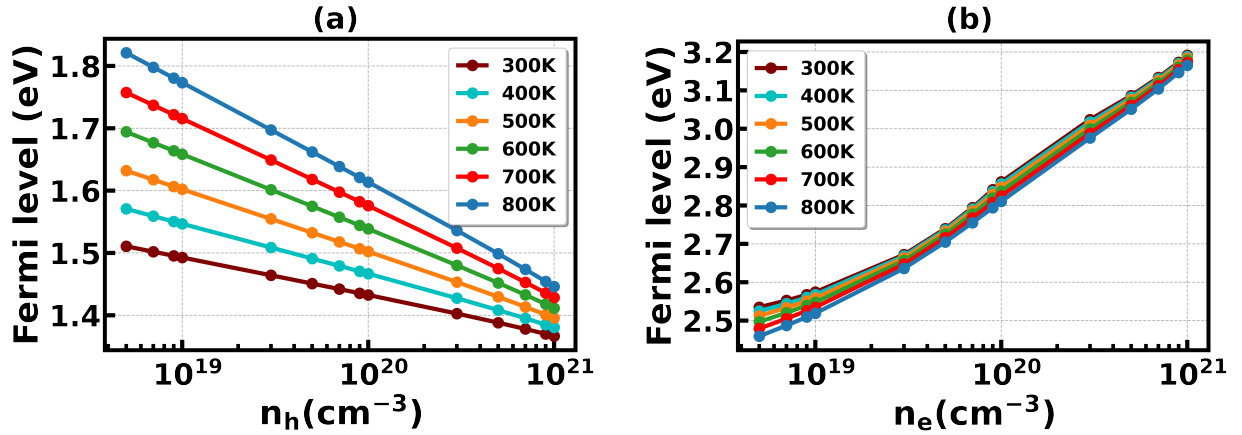

Figure S1: Shifting of Fermi level at different charge carrier concentrations for (a) p-type and (b) n-type KCaBi

## S4. Convergence of lattice thermal conductivity at 300 K with respect to q-point grid

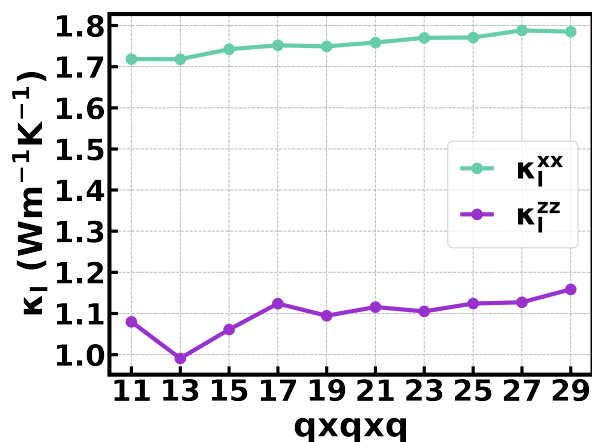

Figure S2: Convergence of lattice thermal conductivity at 300 K with respect to q-point grid

## S5. AIMD at 800 K

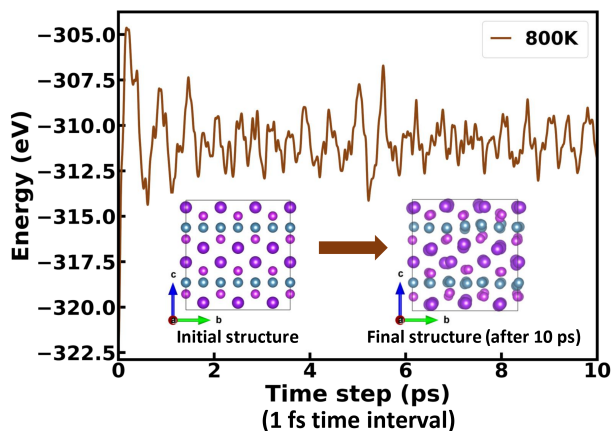

Figure S3: Plot of  $2 \times 2 \times 2$  KCaBi supercell energy at different time step up to 20 ps for ab initio molecular dynamics simulation at 800 K

## S6. Electron and hole effective masses along different K-path with respect to static mass of electron ( $m_e$ )

Table S1: Electron effective masses ( $m_e^*/m_e$ ) along different K-path

| Charge carrier                          | CBM-A | CBM-R | CBM-M | CBM-Y | CBM-Z |
|-----------------------------------------|-------|-------|-------|-------|-------|
| Electron effective mass ( $m_e^*/m_e$ ) | 0.140 | 0.146 | 0.132 | 0.132 | 0.199 |

Table S2: Hole effective masses ( $m_h^*/m_e$ ) along different K-path

| Charge carrier                      | VBM-A | VBM-R | VBM-M | VBM-Y | VBM-Z  | VBM- $\Gamma$ |
|-------------------------------------|-------|-------|-------|-------|--------|---------------|
| Hole effective mass ( $m_h^*/m_e$ ) | 0.526 | 0.515 | 0.628 | 0.872 | 10.081 | 2.595         |

## S7. Three-phonon phase space at 800 K

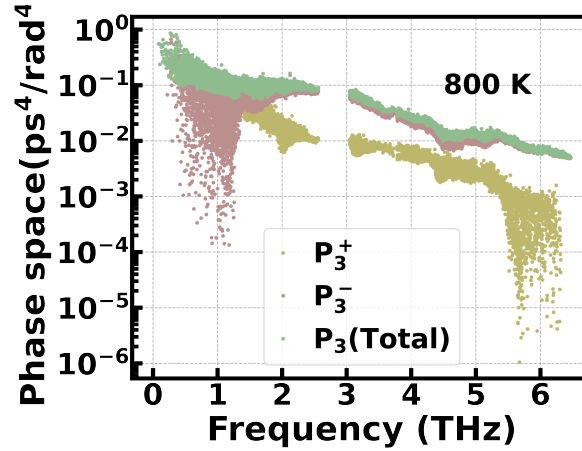

Figure S4: Three-phonon phase space at 800 K

## S8. Phonon scattering rate at 800 K

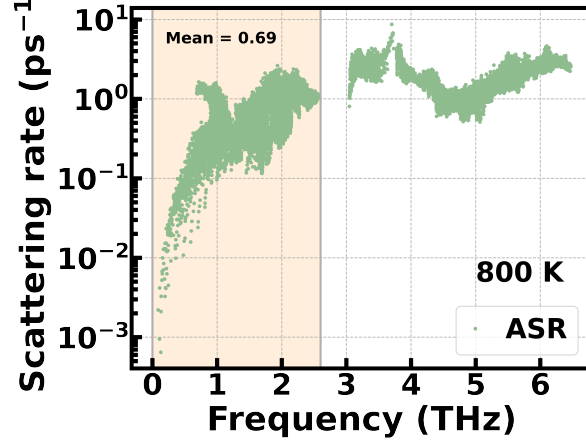

Figure S5: Phonon scattering rate for three-phonon scattering process at 800 K

## S9. Charge carrier scattering rate for p-type KCaBi

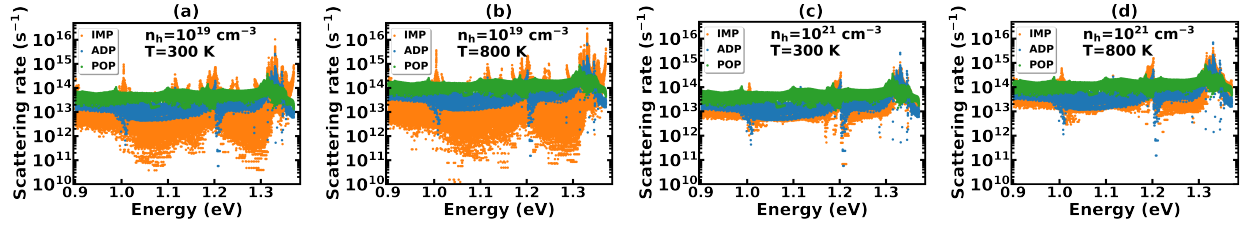

Figure S6: Hole scattering rates for hole concentration  $10^{19} \text{ cm}^{-3}$  at temperature (a) 300 K, (b) 800 K; and for  $10^{21} \text{ cm}^{-3}$  at temperature (c) 300 K, (d) 800 K, respectively, for p-type KCaBi.

## S10. Charge carrier scattering rate for n-type KCaBi

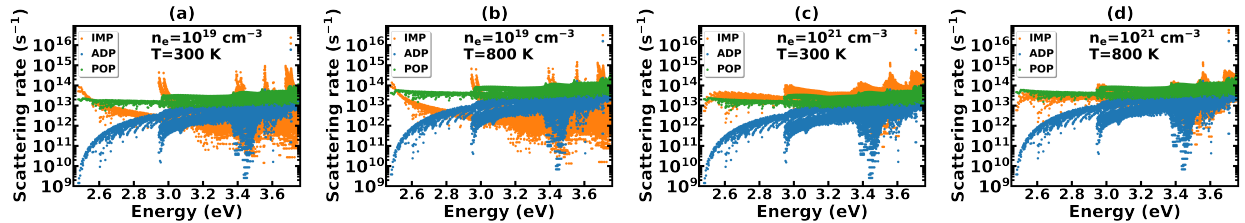

Figure S7: Electron scattering rates for electron concentration  $10^{19} \text{ cm}^{-3}$  at temperature (a) 300 K, (b) 800 K; and for  $10^{21} \text{ cm}^{-3}$  at temperature (c) 300 K, (d) 800 K, respectively, for n-type KCaBi.
